# Supplementary material for: High concentration DNA solubility in bio-ionic liquids with long-lasting chemical and structural stability at room temperature
Source: Royal Society of Chemistry journal article supplement (doi:10.1039/c5ra03512k), 2015-01-01
Supplement: c5ra03512k1.pdf [file c5ra03512k1.pdf]

## High concentration DNA solubility in bio-ionic liquids with long-lasting chemical and structural stability at room temperature

Mukesh Sharma,<sup>a,b</sup> Dibyendu Mondal,<sup>a,b</sup> Nripat Singh,<sup>a,b</sup> Nitin Trivedi, Jitkumar Bhatt and Kamalesh Prasad <sup>\*a,b</sup>

<sup>a</sup> Marine Biotechnology and Ecology Discipline, CSIR-Central Salt & Marine Chemicals Research Institute, G. B Marg, Bhavnagar-364002 (Gujarat), India, Phone No : +91-278-2567760. Fax No. +91-278-2567562. Email: kamlesh@csmcri.org / drkamaleshp@gmail.com]

<sup>b</sup> AcSIR- Central Salt & Marine Chemicals Research Institute, G. B Marg, Bhavnagar-364002 (Gujarat), India

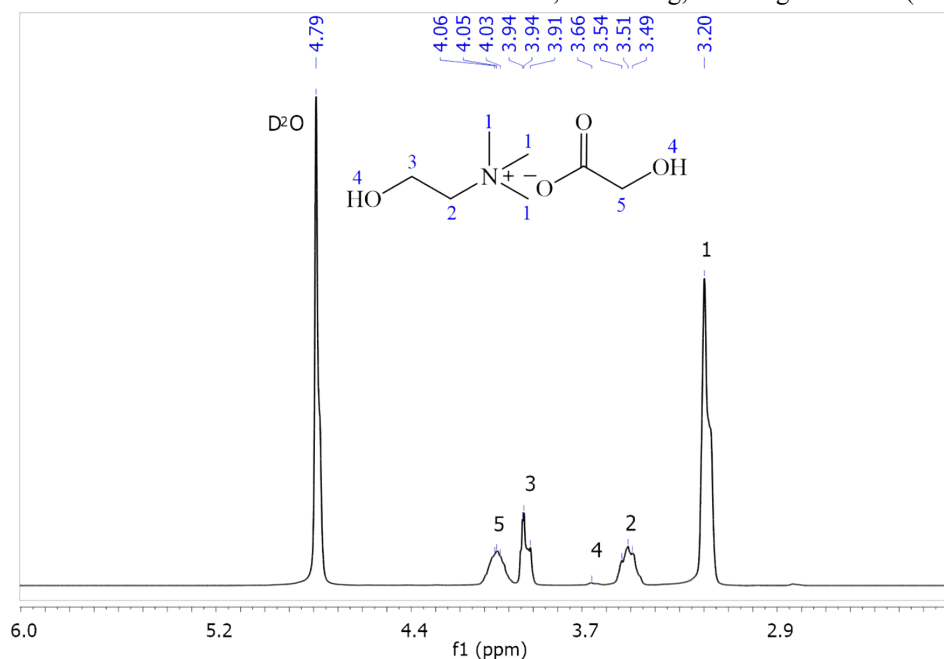

**Figure S1:** <sup>1</sup>H NMR spectra of Cho-glycolate ; <sup>1</sup>H NMR (D<sub>2</sub>O, 200 MHz, δ/ppm relative to TMS): 3.2 (*s*, 9H, -N-CH<sub>3</sub>), 3.51 (*t*, 2H, -CH<sub>2</sub>-N-), 3.66 (*s*, 2H, -OH), 3.94 (*t*, 2H, -O-CH<sub>2</sub>-), 4.05 (*t*, 2H, -CO-CH<sub>2</sub>-O-).

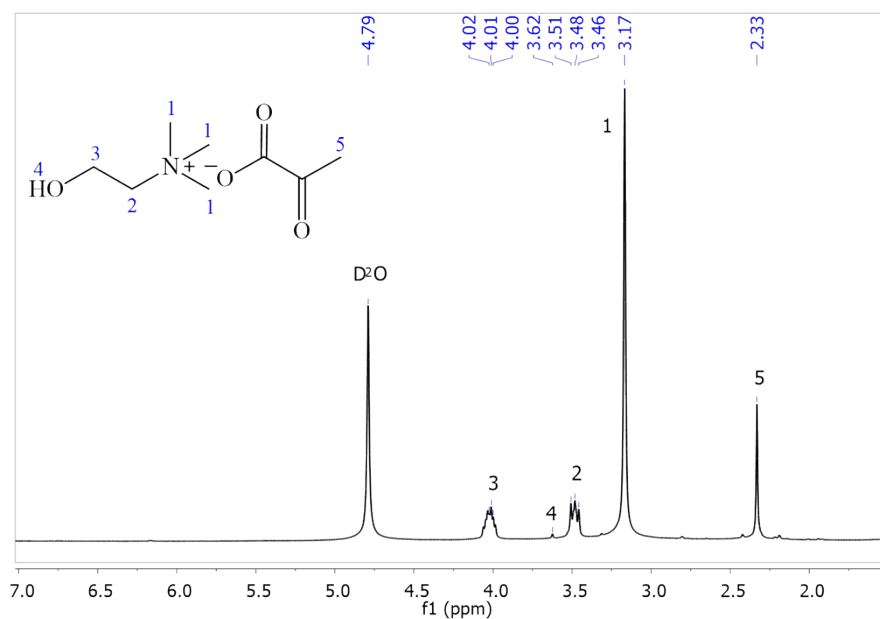

**Figure S2:** <sup>1</sup>H NMR spectra of Choline pyruvate ; <sup>1</sup>H NMR (D<sub>2</sub>O, 200 MHz, δ/ppm relative to TMS): 2.33 (*s*, 3H, -CH<sub>3</sub>), 3.17 (*s*, 9H, -N-CH<sub>3</sub>), 3.48 (*t*, 2H, -CH<sub>2</sub>-N-), 3.62 (*s*, 1H, -OH), 4.01 (*t*, 2H, -O-CH<sub>2</sub>-).

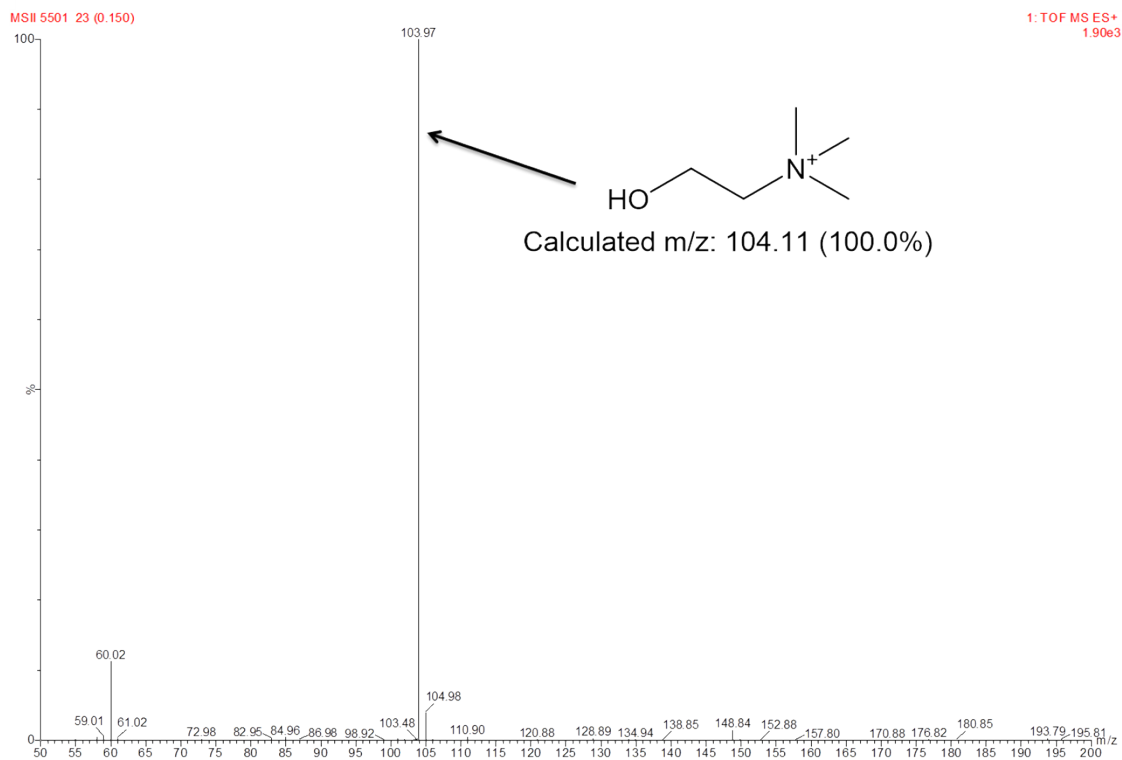

Figure S3: ESI-MS spectra of Choline glycolate in ES (+)ve mode.

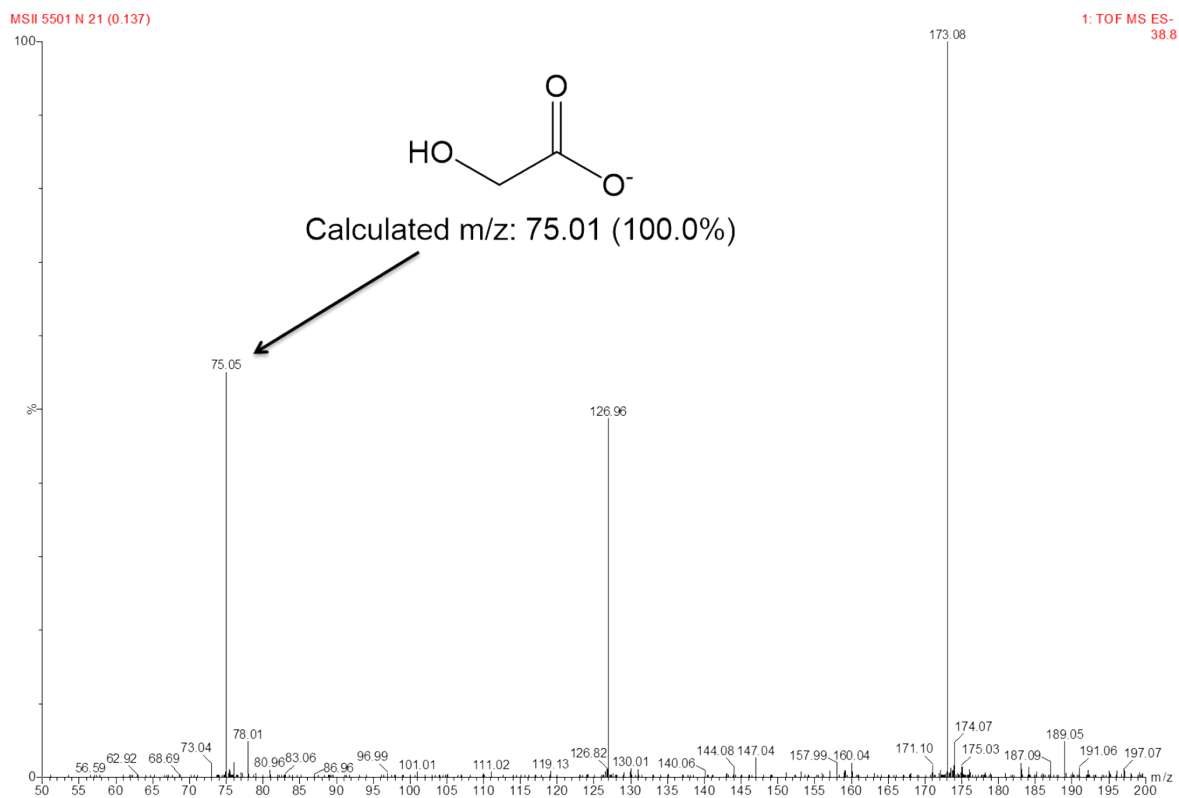

Figure S4: ESI-MS spectra of Choline glycolate in ES (-)ve mode.

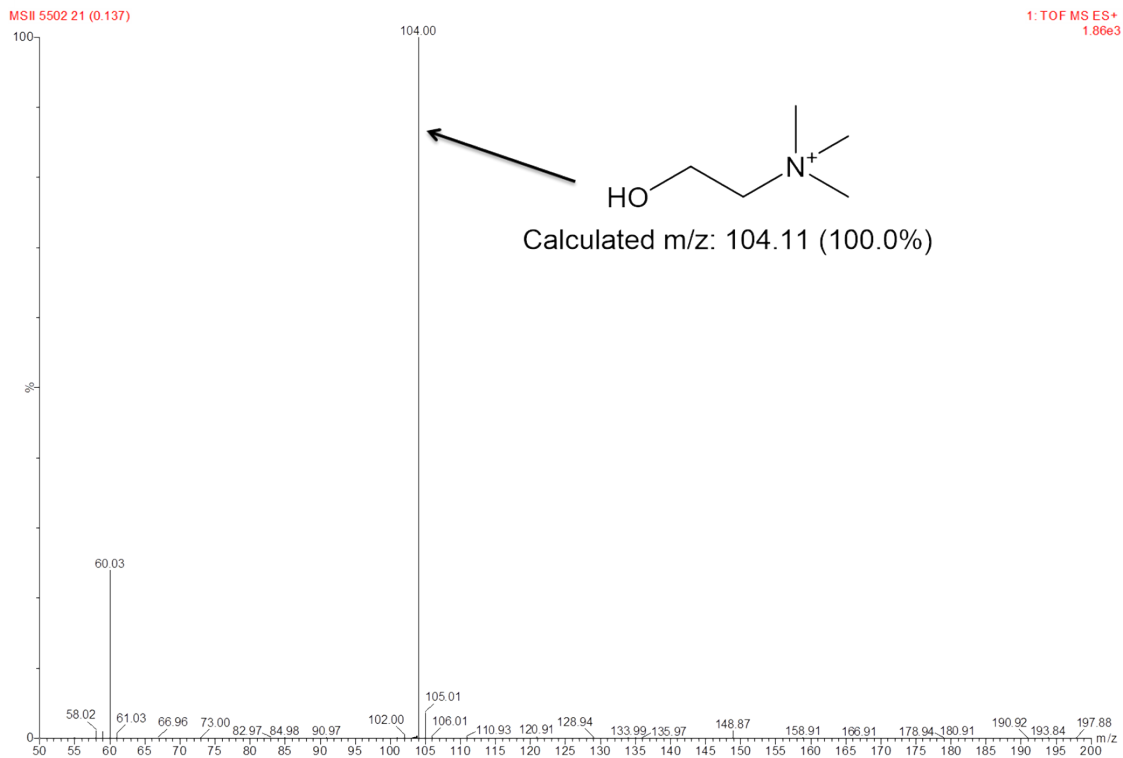

**Figure S5:** ESI-MS spectra of Choline pyruvate in ES (+)ve mode.

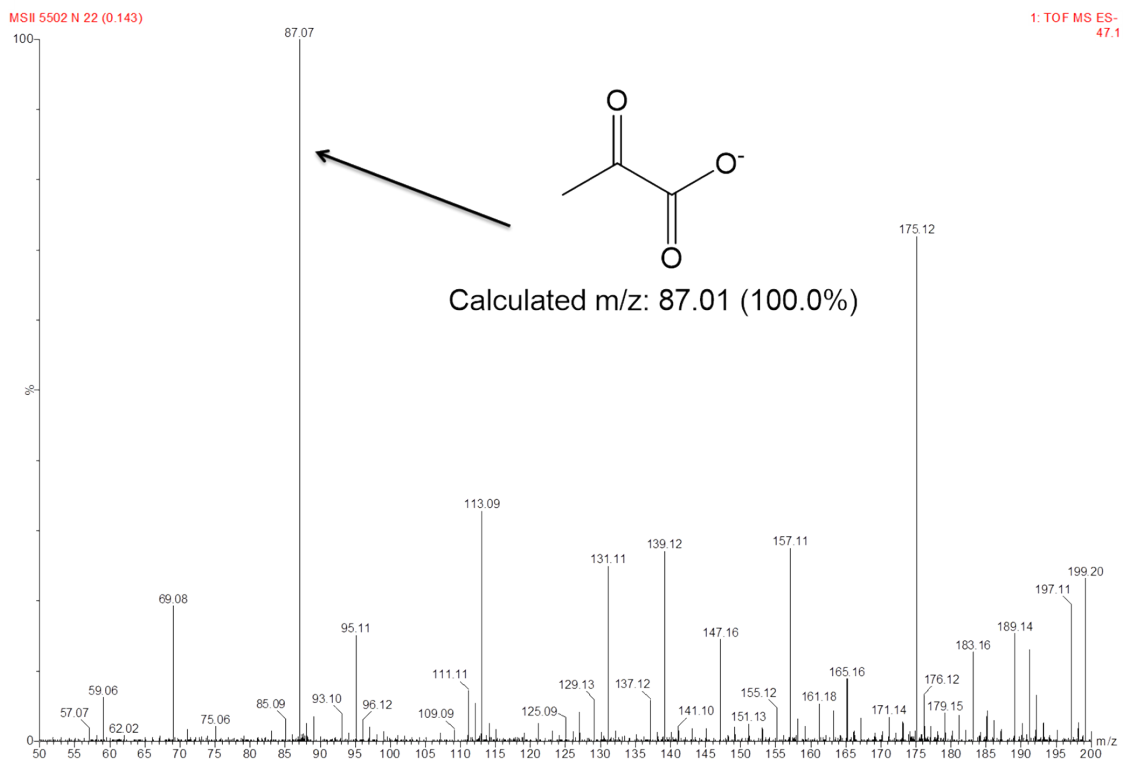

**Figure S6:** ESI-MS spectra of Choline pyruvate in ES (-)ve mode.

**Table S1:** The physiochemical parameters of bio-ILs used in this study

| Parameters                     | Bio-ionic liquid |         |
|--------------------------------|------------------|---------|
|                                | Cho-Gly          | Cho-Pyr |
| Viscosity (mPa.s) at 25 °C     | 93.7             | 204.7   |
| Density (gm.cm <sup>-3</sup> ) | 1.204            | 1.186   |
| T <sub>g</sub> (°C)            | -98.4            | -98.8   |
| T <sub>m</sub> (°C)            | 16.0             | 16.6    |
| T <sub>dec</sub> (°C)          | 256              | 230     |
| Moisture contents (wt %)       | 1.65             | 1.81    |

Note: T<sub>g</sub> = Glass transition temperature; T<sub>m</sub> = Melting temperature; T<sub>dec</sub> = Decomposition temperature.

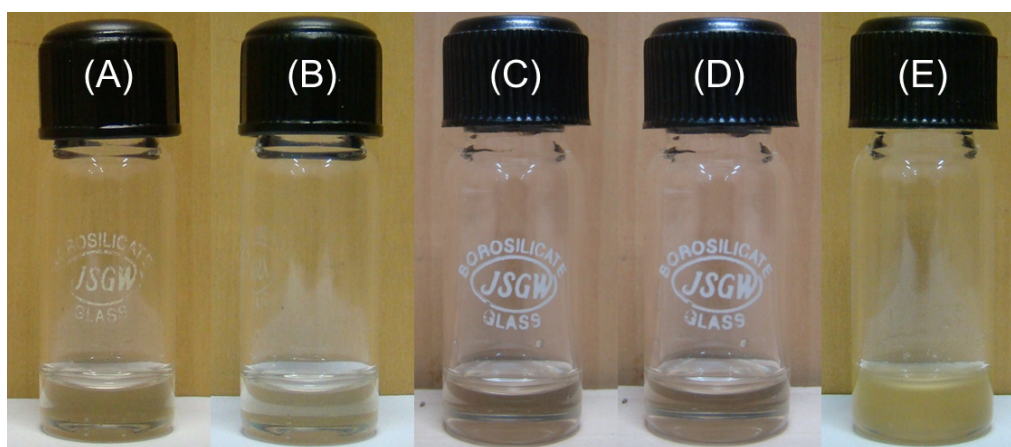

**Figure S7:** Digital photographs of Cho-Gly after dissolution of DNA in different concentrations (A) 2 wt %, (B) 4 wt %, (C) 6 wt %, (D) 8 wt %, and (E) 10 wt %.

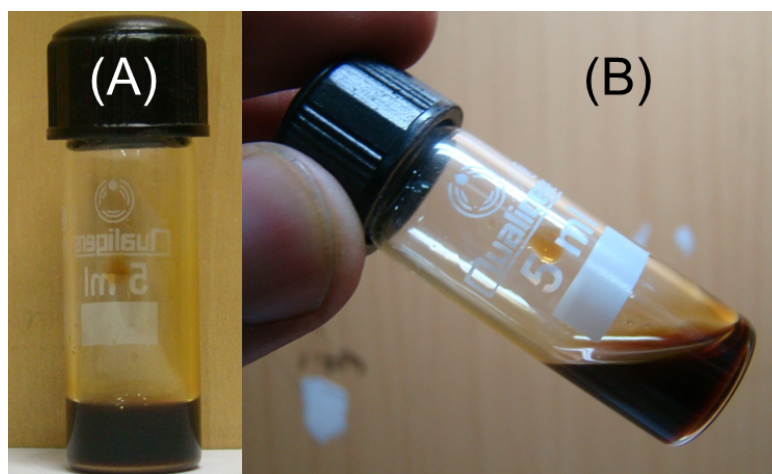

**Figure S8:** Optical images of Cho-Pyr (A) and Cho-Pyr after dissolution of 2 wt % DNA (B).

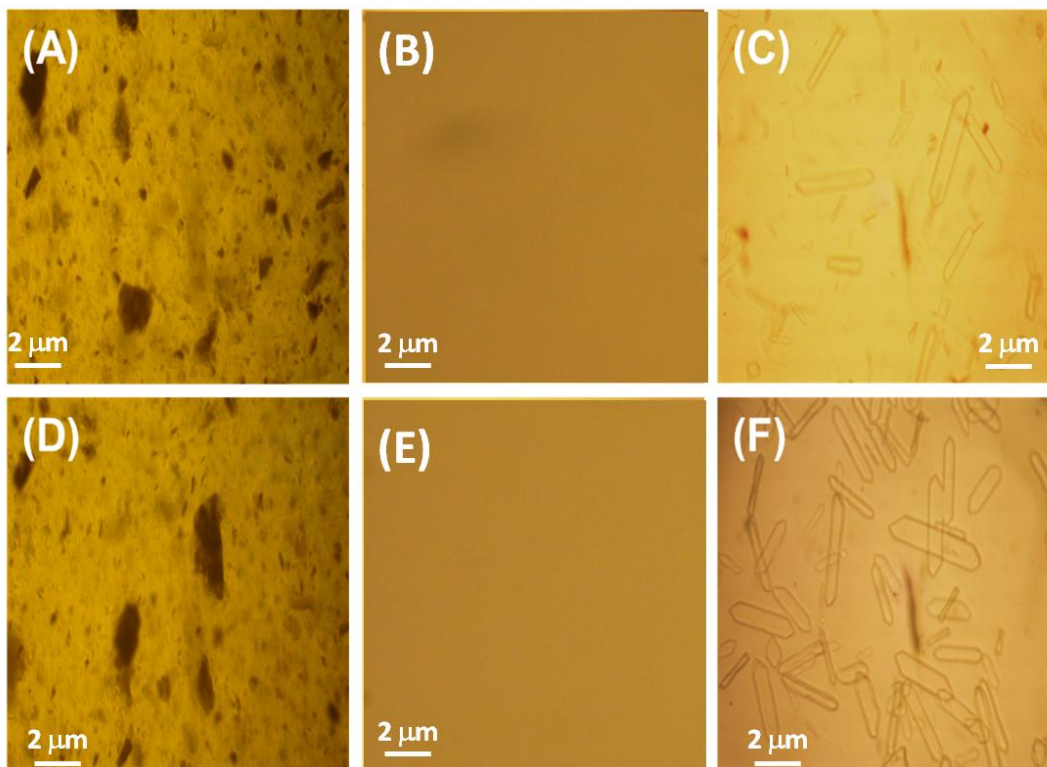

**Figure S9:** Phase contrast optical micrograph of (A) DNA in Cho-Gly (at 0 minute) (B) 8 % *w/w* DNA in Cho-Gly after complete dissolution (C) 10 % *w/w* DNA in Cho-Gly (after 48 h), (D) DNA in Cho-Pyr (at 0 minute), (E) 2 % *w/w* DNA in Cho-Pyr after complete dissolution, and (F) 4 % DNA in Cho-Pyr (after 48 h).

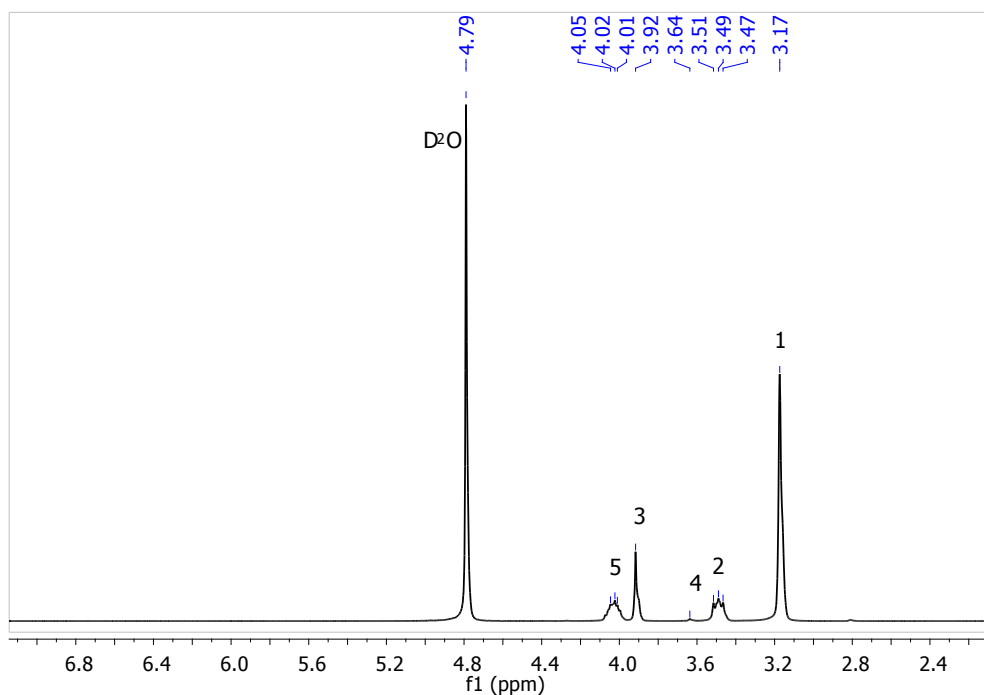

**Figure S10:**  $^1\text{H}$  NMR spectra of recovered Choline glycolate

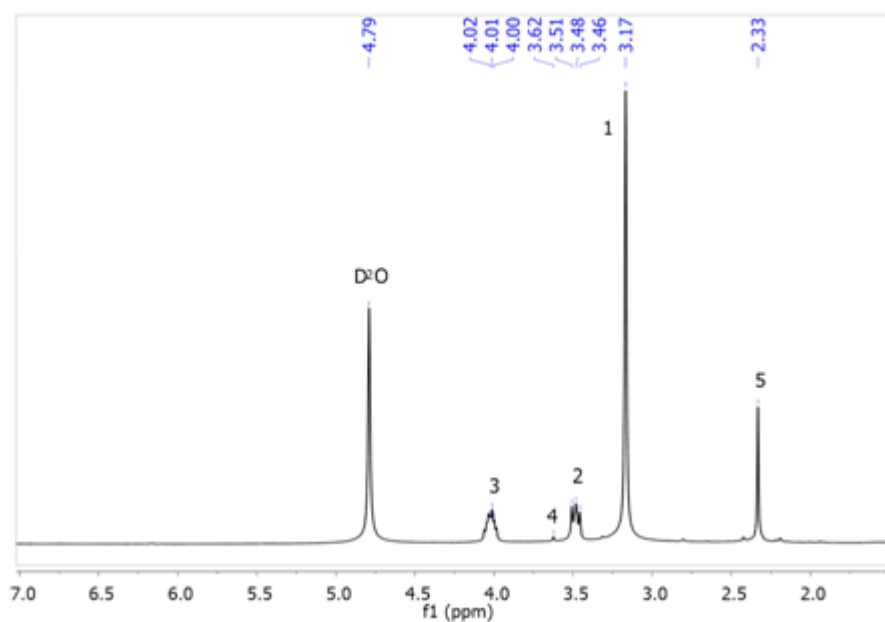

**Figure S10:**  $^1\text{H}$  NMR spectra of recovered Choline pyruvate

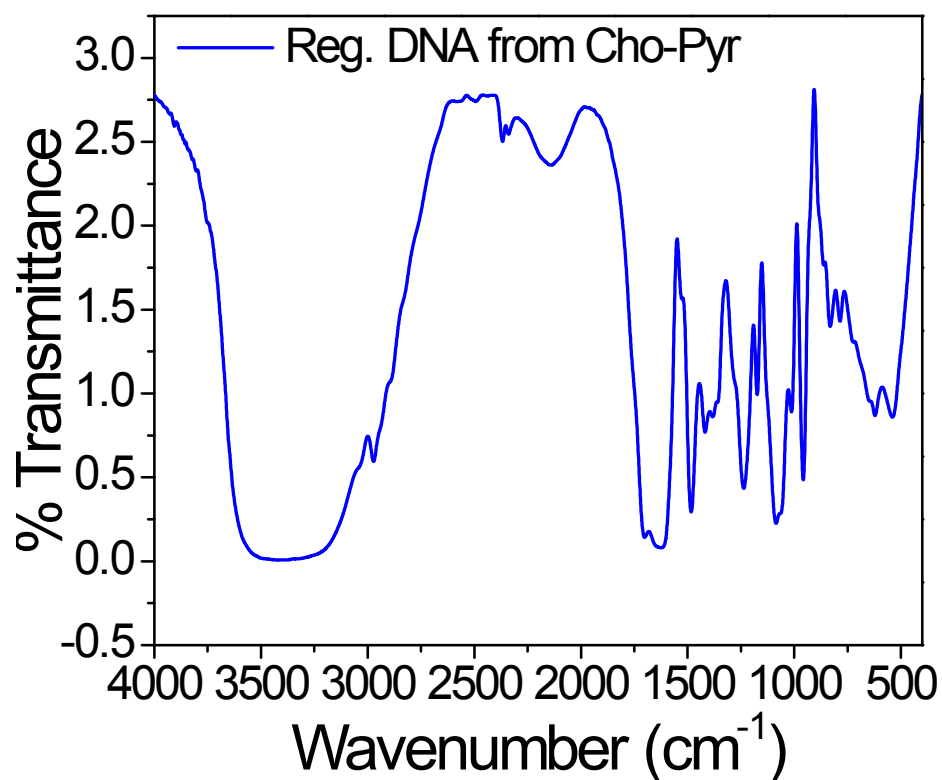

**Figure S11:** FT-IR spectra of regenerated DNA from Cho-Pyr.

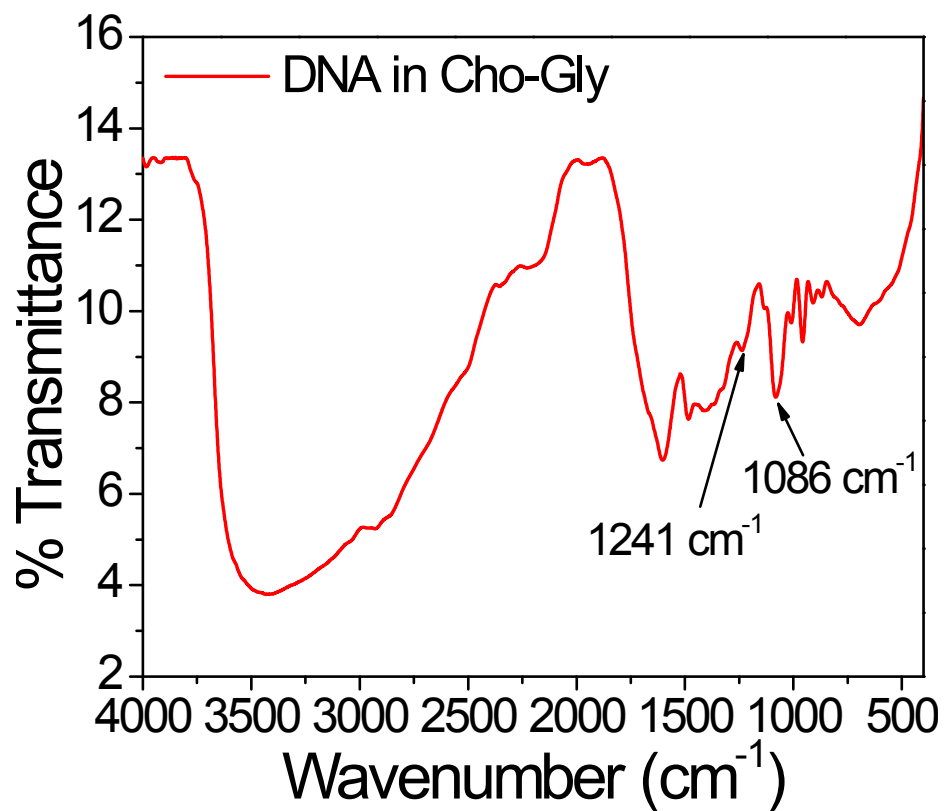

**Figure S12:** FT-IR spectra of DNA in Cho-Gly solution.

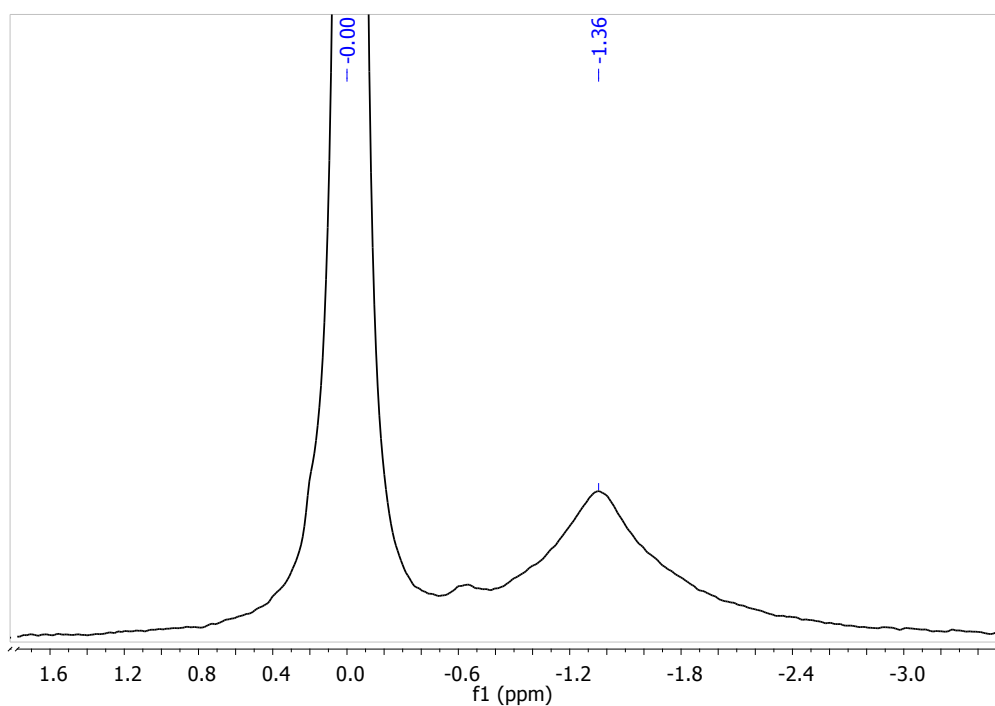

**Figure S13:**  $^{31}\text{P}$  NMR spectra of DNA in Cho-Gly using ortho-phosphoric acid as internal standard.

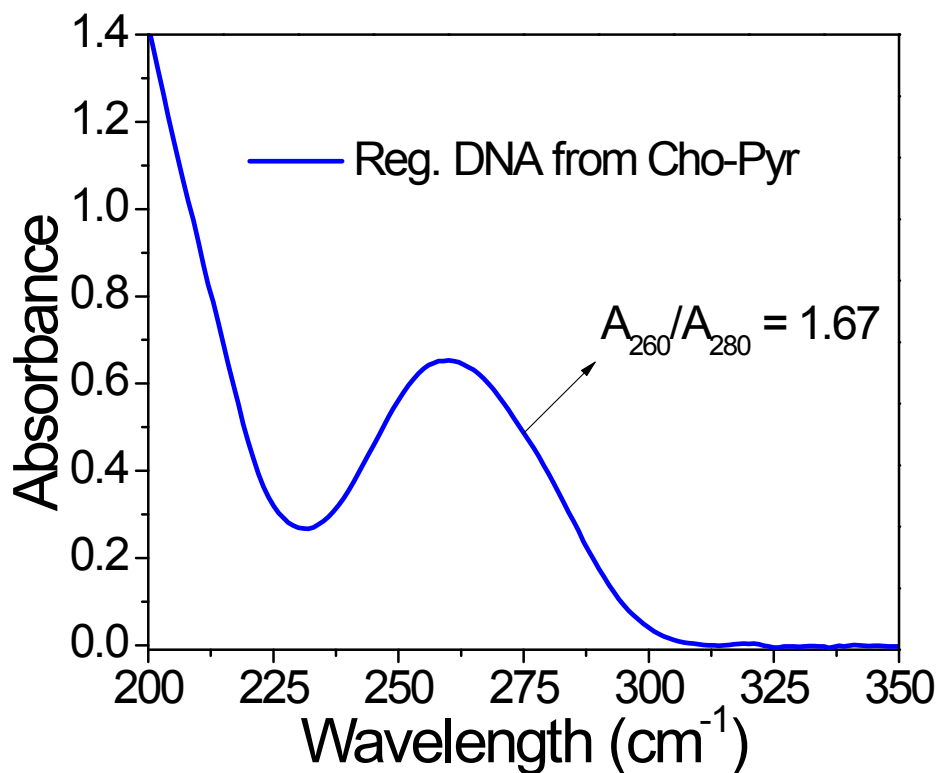

Figure S14: UV-Vis spectra of regenerated DNA ( $6.0 \times 10^{-5} \text{ mol.L}^{-1}$ ) from Cho-Pyr.

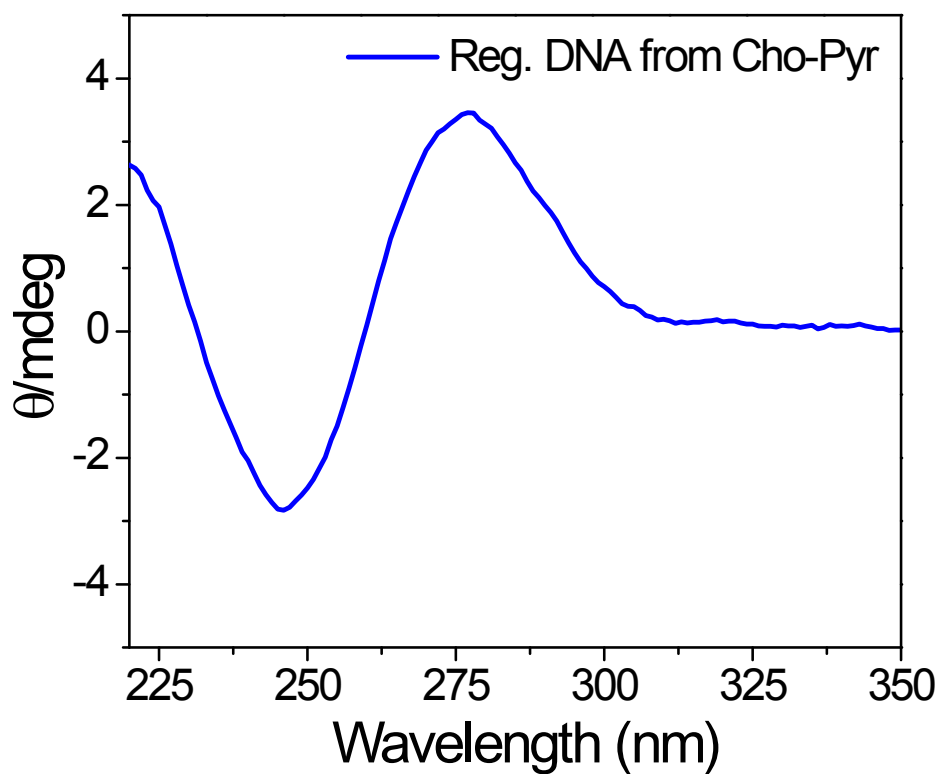

Figure S15: CD spectra of regenerated DNA ( $6.0 \times 10^{-5} \text{ mol.L}^{-1}$ ) from Cho-Pyr.



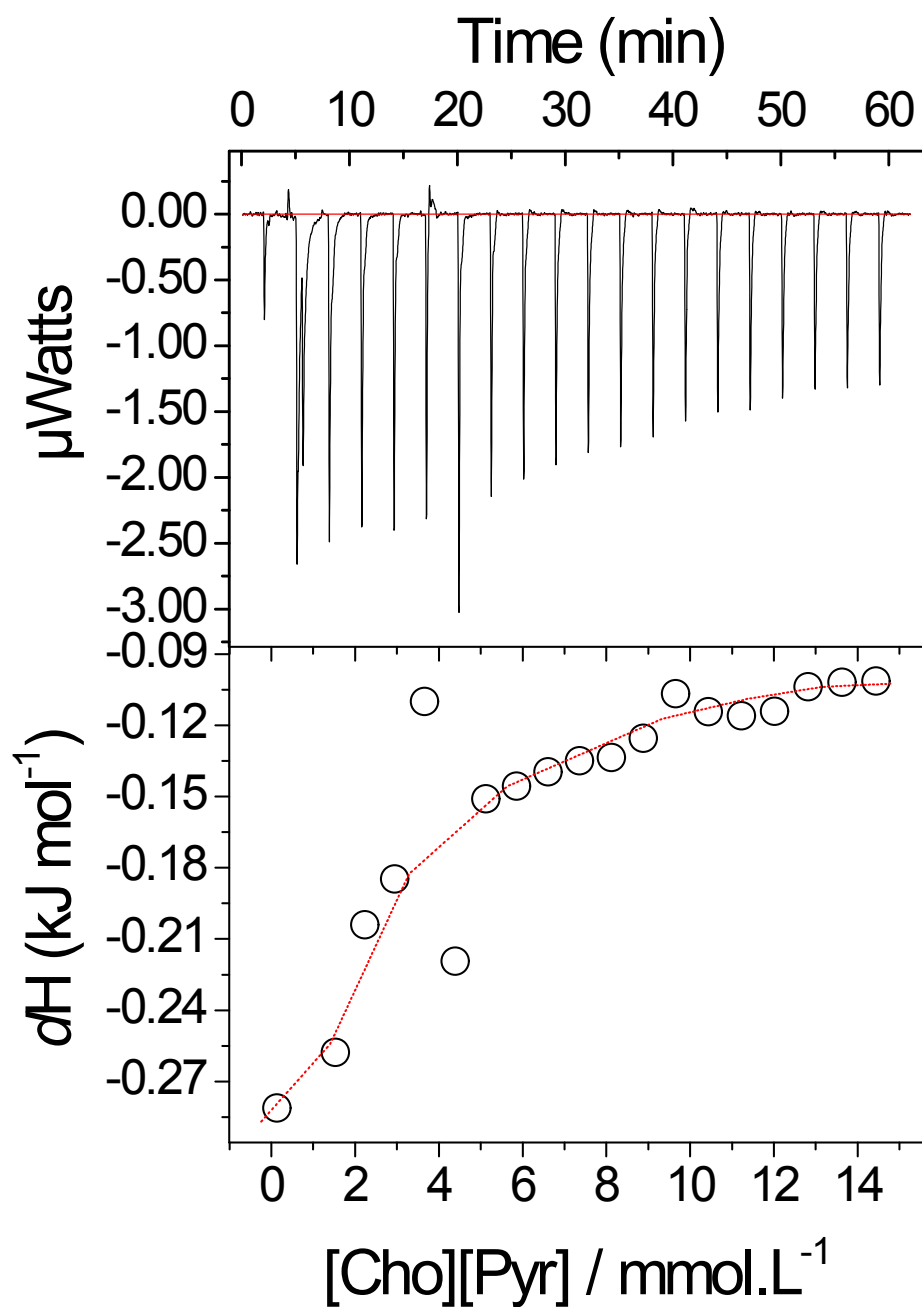

**Figure S16:** Isothermal titration calorimetric (ITC) plot for titration of 600  $\mu\text{L}$  of  $5.0 \times 10^{-5} \text{ mol.L}^{-1}$  DNA solution in tris-HCl buffer with successive addition of 2  $\mu\text{L}$  of  $0.1 \text{ mol.L}^{-1}$  Cho-Pyr solutions at 298.15 K.

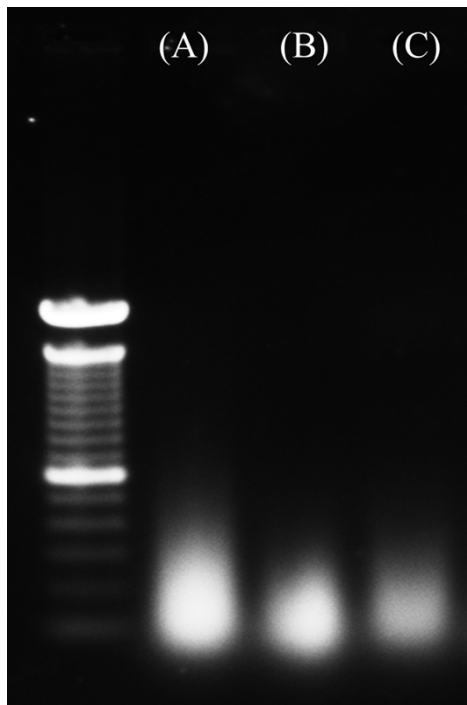

**Figure S17:** Agarose gel electrophoresis of standard salmon testes DNA (A) and regenerated DNA from Cho-Gly (B) and Cho-Pyr (C).

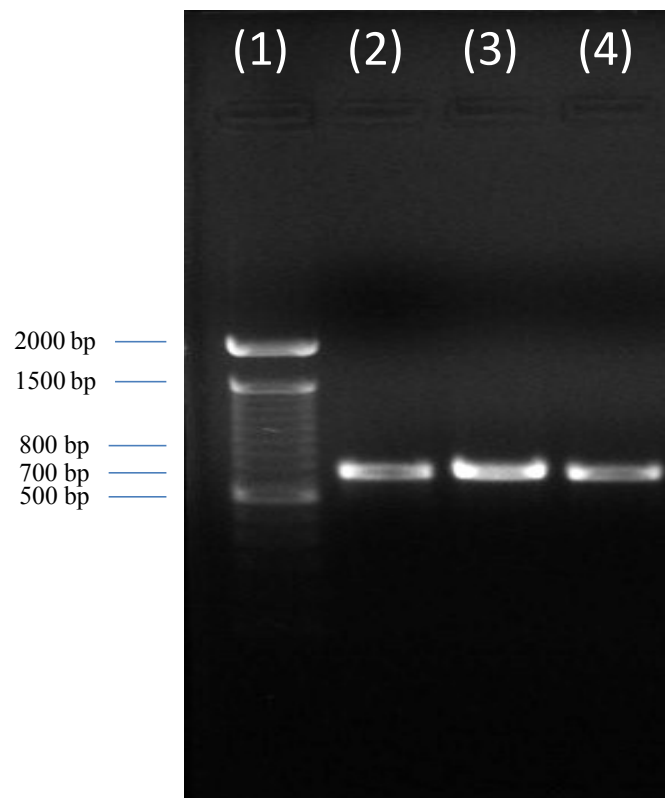

1 = Marker, 2 : standard DNA ; 3 : DNA recovered from Cho-Gly and 4 : DNA recovered from Cho-Pyr

**Fig. S18:** The PCR amplification of the standard and regenerated *Ulva* genomic DNA
